# Supplementary material for: Blood Loss Estimation in Small Animals and Assessment of a Pictorial Tool to Improve Accuracy in a Global Population of Veterinary Anesthesia Staff
Source: Front Vet Sci. 2020 May 7;7:212. doi: 10.3389/fvets.2020.00212 (PMC7221018; doi:10.3389/fvets.2020.00212)
Supplement: Supplementary file 1 [file Table_1.xlsx]

## Sheet: Sheet1
Respondent ID	Collector ID	Start Date	End Date	IP Address	Do you agree to participate in the survey?	Which country are you completing this survey from?	What is your professional role/level of expertise?		How many years of experience do you have?	Are you:¬†	https://static.wixstatic.com/media/15b8f6_5e473f42bbb5434bb483d97df5720636~mv2_d_2720_1293_s_2.jpg/v1/fill/w_600,h_285,al_c,q_80,usm_0.66_1.00_0.01/15b8f6_5e473f42bbb5434bb483d97df5720636~mv2_d_2720_1293_s_2.jpg	https://static.wixstatic.com/media/15b8f6_99d8d9d837ac414c98836c4e3dab6d4a~mv2_d_3335_1733_s_2.jpg/v1/fill/w_600,h_312,al_c,q_80,usm_0.66_1.00_0.01/15b8f6_99d8d9d837ac414c98836c4e3dab6d4a~mv2_d_3335_1733_s_2.jpg	https://static.wixstatic.com/media/15b8f6_335b905eae6241e0a701211bd14317b9~mv2_d_2725_2438_s_4_2.jpg/v1/fill/w_600,h_537,al_c,q_80,usm_0.66_1.00_0.01/15b8f6_335b905eae6241e0a701211bd14317b9~mv2_d_2725_2438_s_4_2.jpg	https://static.wixstatic.com/media/15b8f6_ba6a4d44975c46c3819029119971d10e~mv2_d_3607_2254_s_2.jpg/v1/fill/w_600,h_375,al_c,q_80,usm_0.66_1.00_0.01/15b8f6_ba6a4d44975c46c3819029119971d10e~mv2_d_3607_2254_s_2.jpg	https://static.wixstatic.com/media/15b8f6_56f82dbc7c1d46ad824813220dab911a~mv2_d_2392_1642_s_2.jpg/v1/fill/w_609,h_418,al_c,q_80,usm_0.66_1.00_0.01/15b8f6_56f82dbc7c1d46ad824813220dab911a~mv2_d_2392_1642_s_2.jpg	Did you follow the link above?	https://static.wixstatic.com/media/15b8f6_5e473f42bbb5434bb483d97df5720636~mv2_d_2720_1293_s_2.jpg/v1/fill/w_600,h_285,al_c,q_80,usm_0.66_1.00_0.01/15b8f6_5e473f42bbb5434bb483d97df5720636~mv2_d_2720_1293_s_2.jpg	https://static.wixstatic.com/media/15b8f6_99d8d9d837ac414c98836c4e3dab6d4a~mv2_d_3335_1733_s_2.jpg/v1/fill/w_600,h_312,al_c,q_80,usm_0.66_1.00_0.01/15b8f6_99d8d9d837ac414c98836c4e3dab6d4a~mv2_d_3335_1733_s_2.jpg	https://static.wixstatic.com/media/15b8f6_335b905eae6241e0a701211bd14317b9~mv2_d_2725_2438_s_4_2.jpg/v1/fill/w_600,h_537,al_c,q_80,usm_0.66_1.00_0.01/15b8f6_335b905eae6241e0a701211bd14317b9~mv2_d_2725_2438_s_4_2.jpg	https://static.wixstatic.com/media/15b8f6_ba6a4d44975c46c3819029119971d10e~mv2_d_3607_2254_s_2.jpg/v1/fill/w_600,h_375,al_c,q_80,usm_0.66_1.00_0.01/15b8f6_ba6a4d44975c46c3819029119971d10e~mv2_d_3607_2254_s_2.jpg	https://static.wixstatic.com/media/15b8f6_56f82dbc7c1d46ad824813220dab911a~mv2_d_2392_1642_s_2.jpg/v1/fill/w_609,h_418,al_c,q_80,usm_0.66_1.00_0.01/15b8f6_56f82dbc7c1d46ad824813220dab911a~mv2_d_2392_1642_s_2.jpg
					Response	Response	Response	Other (please specify)	Response	Response	Open-Ended Response	Open-Ended Response	Open-Ended Response	Open-Ended Response	Open-Ended Response	Response	Open-Ended Response	Open-Ended Response	Open-Ended Response	Open-Ended Response	Open-Ended Response
10545327337	225655114	02/21/2019 11:06:29 PM	02/21/2019 11:10:16 PM	179.13.141.41	Yes, I have read the above information and agree to participate in the survey.	Colombia	Resident/ Residency Trained		2019-10-05	Male	20	100	50	6	120	Yes, the Guide is ready to help me with the next section.	60	100	50	20	100
10621117631	225655114	03/27/2019 11:34:29 AM	03/27/2019 11:43:36 AM	134.115.213.90	Yes, I have read the above information and agree to participate in the survey.	Australia	Specialist (e.g. European or American Diplomat, ANZCVS Fellow)		>15	Female	10	70	13	16	25	Yes, the Guide is ready to help me with the next section.	10	120	36	66	110
10564555705	225655114	2019-02-03 05:00:00	2019-02-03 05:05:00	176.83.105.16	Yes, I have read the above information and agree to participate in the survey.	Spain	Advanced General Practice Veterinarian (Membership/Certificate - any discipline)		>15	Male	15	50	10	15	35	Yes, the Guide is ready to help me with the next section.	15	25	10	12	50
10550716447	225655114	02/24/2019 06:14:52 AM	02/24/2019 06:23:50 AM	84.78.21.70	Yes, I have read the above information and agree to participate in the survey.	Spain	General Practice Veterinarian		2019-10-05	Female	15	75	25	60	150	Yes, the Guide is ready to help me with the next section.	20	200	20	75	75
10541491993	225655114	02/20/2019 05:29:23 PM	02/20/2019 05:45:36 PM	193.171.106.218	Yes, I have read the above information and agree to participate in the survey.	Austria	Resident/ Residency Trained		2019-10-05	Female	50	100	15	28	38	Yes, the Guide is ready to help me with the next section.	30	140	67	70	110
10565704651	225655114	2019-02-03 22:07:00	2019-02-03 22:16:00	176.83.26.2	Yes, I have read the above information and agree to participate in the survey.	Spain	Specialist (e.g. European or American Diplomat, ANZCVS Fellow)		>15	Male	30	100	23	25	23	Yes, the Guide is ready to help me with the next section.	40	140	34	64	69
10616673740	225655114	03/26/2019 12:23:55 AM	03/26/2019 12:42:52 AM	132.204.251.254	Yes, I have read the above information and agree to participate in the survey.	Canada	Specialist (e.g. European or American Diplomat, ANZCVS Fellow)	DACVAA	2019-10-05	Male	20	100	20	50	70	Yes, the Guide is ready to help me with the next section.	40	140	46	61	127
10540370415	225655114	02/20/2019 07:24:18 AM	02/20/2019 07:30:42 AM	86.131.143.68	Yes, I have read the above information and agree to participate in the survey.	United Kingdom	Advanced General Practice Veterinarian (Membership/Certificate - any discipline)		>15	Male	50	50	17	70	70	Yes, the Guide is ready to help me with the next section.	40	76	45	70	65
10544739624	225655114	02/21/2019 04:15:34 PM	02/21/2019 04:22:44 PM	37.228.236.237	Yes, I have read the above information and agree to participate in the survey.	Ireland	Specialist (e.g. European or American Diplomat, ANZCVS Fellow)		2015-10-01	Female	10	75	30	30	75	Yes, the Guide is ready to help me with the next section.	40	140	40	90	135
10564364764	225655114	2019-02-03 03:27:00	2019-02-03 03:49:00	81.145.211.3	Yes, I have read the above information and agree to participate in the survey.	United Kingdom	Resident/ Residency Trained		2019-10-05	Female	50	100	20	35	80	Yes, the Guide is ready to help me with the next section.	40	200	64	34	130
10616098079	225655114	03/25/2019 07:50:41 PM	03/25/2019 07:57:00 PM	82.70.175.246	Yes, I have read the above information and agree to participate in the survey.	United Kingdom	Specialist (e.g. European or American Diplomat, ANZCVS Fellow)		2019-05-02	Male	15	50	20	30	100	Yes, the Guide is ready to help me with the next section.	40	70	15	65	110
10564391994	225655114	2019-02-03 03:50:00	2019-02-03 03:59:00	84.120.156.44	Yes, I have read the above information and agree to participate in the survey.	Spain	Specialist (e.g. European or American Diplomat, ANZCVS Fellow)		2015-10-01	Male	50	40	20	30	100	Yes, the Guide is ready to help me with the next section.	40	120	70	50	200
10545973475	225655114	02/22/2019 03:09:31 AM	02/22/2019 03:15:33 AM	198.137.20.153	Yes, I have read the above information and agree to participate in the survey.	United States	Specialist (e.g. European or American Diplomat, ANZCVS Fellow)		>15	Female	50	75	35	45	100	Yes, the Guide is ready to help me with the next section.	40	145	75	80	130
10553863450	225655114	02/26/2019 05:24:51 AM	02/26/2019 05:43:22 AM	91.115.135.124	Yes, I have read the above information and agree to participate in the survey.	Austria	Specialist (e.g. European or American Diplomat, ANZCVS Fellow)		2019-10-05	Female	100	150	20	45	110	Yes, the Guide is ready to help me with the next section.	40	140	36	45	110
10564553196	225655114	2019-02-03 04:59:00	2019-02-03 05:06:00	46.6.137.14	Yes, I have read the above information and agree to participate in the survey.	Spain	Advanced General Practice Veterinarian (Membership/Certificate - any discipline)		2019-10-05	Male	30	150	30	80	120	Yes, the Guide is ready to help me with the next section.	40	140	80	90	132
10556158286	225655114	02/27/2019 01:50:56 AM	02/27/2019 02:28:32 AM	132.204.243.252	Yes, I have read the above information and agree to participate in the survey.	Canada	Student		I am still a student	Female	50	200	20	60	120	Yes, the Guide is ready to help me with the next section.	40	140	8	60	100
10555908551	225655114	02/27/2019 12:52:44 AM	02/27/2019 01:02:38 AM	132.204.162.64	Yes, I have read the above information and agree to participate in the survey.	Canada	Intern		<2 years	Female	70	100	15	70	130	Yes, the Guide is ready to help me with the next section.	40	140	76	70	122
10547369281	225655114	02/22/2019 02:39:49 PM	02/22/2019 02:48:25 PM	167.56.187.198	Yes, I have read the above information and agree to participate in the survey.	Uruguay	Student		2019-10-05	Female	100	150	15	100	300	Yes, the Guide is ready to help me with the next section.	40	140	100	100	160
10545241628	225655114	02/21/2019 10:17:38 PM	02/21/2019 10:24:23 PM	131.227.17.122	Yes, I have read the above information and agree to participate in the survey.	United Kingdom	Specialist (e.g. European or American Diplomat, ANZCVS Fellow)		2015-10-01	Male	50	100	150	50	60	Yes, the Guide is ready to help me with the next section.	50	140	35	55	130
10546905060	225655114	02/22/2019 09:23:49 AM	02/22/2019 09:35:39 AM	90.174.2.228	Yes, I have read the above information and agree to participate in the survey.	Spain	Advanced General Practice Veterinarian (Membership/Certificate - any discipline)		2019-10-05	Female	30	170	5	25	65	Yes, the Guide is ready to help me with the next section.	50	150	75	20	135
10546901193	225655114	02/22/2019 09:22:44 AM	02/22/2019 09:27:07 AM	148.71.202.137	Yes, I have read the above information and agree to participate in the survey.	Portugal	General Practice Veterinarian		2019-10-05	Male	60	150	80	120	130	Yes, the Guide is ready to help me with the next section.	50	150	78	40	85
10672966736	225655114	04/18/2019 11:56:08 PM	04/19/2019 12:07:59 AM	131.212.248.70	Yes, I have read the above information and agree to participate in the survey.	United States	Specialist (e.g. European or American Diplomat, ANZCVS Fellow)		2015-10-01	Female	50	100	80	110	190	Yes, the Guide is ready to help me with the next section.	50	150	80	65	130
10539623621	225655114	02/20/2019 03:13:06 AM	02/20/2019 03:18:23 AM	137.222.156.180	Yes, I have read the above information and agree to participate in the survey.	United Kingdom	Specialist (e.g. European or American Diplomat, ANZCVS Fellow)		>15	Male	30	50	15	15	25	Yes, the Guide is ready to help me with the next section.	60	140	36	70	108
10548526879	225655114	02/23/2019 02:08:57 AM	02/23/2019 02:21:11 AM	137.149.176.131	Yes, I have read the above information and agree to participate in the survey.	Canada	Specialist (e.g. European or American Diplomat, ANZCVS Fellow)		>15	Female	30	200	32	25	43	Yes, the Guide is ready to help me with the next section.	60	120	56	65	106
10548489054	225655114	02/23/2019 01:55:27 AM	02/23/2019 02:04:25 AM	158.109.104.195	Yes, I have read the above information and agree to participate in the survey.	Spain	Resident/ Residency Trained		>15	Female	40	80	20	25	45	Yes, the Guide is ready to help me with the next section.	60	140	76	65	107
10540600848	225655114	02/20/2019 08:35:23 AM	02/20/2019 08:41:48 AM	90.253.30.246	Yes, I have read the above information and agree to participate in the survey.	United Kingdom	Resident/ Residency Trained		2019-10-05	Female	35	60	20	70	90	Yes, the Guide is ready to help me with the next section.	60	100	76	65	110
10615807080	225655114	03/25/2019 03:41:26 PM	03/25/2019 03:49:28 PM	71.231.56.81	Yes, I have read the above information and agree to participate in the survey.	United States	Resident/ Residency Trained		2015-10-01	Female	50	30	20	40	100	Yes, the Guide is ready to help me with the next section.	60	60	38	75	110
10539546096	225655114	02/20/2019 02:48:38 AM	02/20/2019 03:00:26 AM	174.254.195.97	Yes, I have read the above information and agree to participate in the survey.	United States	Specialist (e.g. European or American Diplomat, ANZCVS Fellow)		>15	Male	60	180	40	22	37	Yes, the Guide is ready to help me with the next section.	65	160	80	35	111
10616085403	225655114	03/25/2019 07:42:03 PM	03/25/2019 08:00:51 PM	194.95.182.9	Yes, I have read the above information and agree to participate in the survey.	Germany	Specialist (e.g. European or American Diplomat, ANZCVS Fellow)		>15	Prefer not to say	70	70	5	6	20	Yes, the Guide is ready to help me with the next section.	70	100	36	55	107
10544836532	225655114	02/21/2019 05:40:35 PM	02/21/2019 05:56:33 PM	137.43.108.25	Yes, I have read the above information and agree to participate in the survey.	Ireland	Specialist (e.g. European or American Diplomat, ANZCVS Fellow)		2019-10-05	Female	65	50	13	35	54	Yes, the Guide is ready to help me with the next section.	70	90	65	55	90
10539444659	225655114	02/20/2019 02:14:05 AM	02/20/2019 02:31:20 AM	159.178.246.96	Yes, I have read the above information and agree to participate in the survey.	United States	Specialist (e.g. European or American Diplomat, ANZCVS Fellow)		2019-10-05	Female	60	70	30	36	55	Yes, the Guide is ready to help me with the next section.	70	100	40	57	173
10545650056	225655114	02/22/2019 01:19:32 AM	02/22/2019 01:25:50 AM	172.58.201.197	Yes, I have read the above information and agree to participate in the survey.	United States	Specialist (e.g. European or American Diplomat, ANZCVS Fellow)		2019-05-02	Female	45	50	20	55	60	Yes, the Guide is ready to help me with the next section.	70	100	60	50	100
10542469683	225655114	02/21/2019 12:18:45 AM	02/21/2019 12:23:34 AM	160.36.198.195	Yes, I have read the above information and agree to participate in the survey.	United States	Specialist (e.g. European or American Diplomat, ANZCVS Fellow)		2019-05-02	Male	50	150	30	40	110	Yes, the Guide is ready to help me with the next section.	70	150	40	70	110
10540428840	225655114	02/20/2019 07:40:00 AM	02/20/2019 07:50:08 AM	129.78.56.142	Yes, I have read the above information and agree to participate in the survey.	Australia	Nurse/Technician	VTS (anaesthesia & Analgesia)	2015-10-01	Male	100	80	40	60	120	Yes, the Guide is ready to help me with the next section.	70	140	67	80	110
10555994938	225655114	02/27/2019 01:26:05 AM	02/27/2019 01:40:14 AM	132.204.162.64	Yes, I have read the above information and agree to participate in the survey.	Canada	Nurse/Technician		>15	Female	75	90	20	30	35	Yes, the Guide is ready to help me with the next section.	75	140	76	70	120
10552396031	225655114	02/25/2019 06:00:32 PM	02/25/2019 06:08:12 PM	92.17.32.74	Yes, I have read the above information and agree to participate in the survey.	United Kingdom	Specialist (e.g. European or American Diplomat, ANZCVS Fellow)		>15	Male	75	125	55	45	50	Yes, the Guide is ready to help me with the next section.	75	150	80	55	90
10540074116	225655114	02/20/2019 03:02:35 AM	02/20/2019 05:59:05 AM	130.64.247.5	Yes, I have read the above information and agree to participate in the survey.	United States	Specialist (e.g. European or American Diplomat, ANZCVS Fellow)		2019-10-05	Female	75	200	40	30	50	Yes, the Guide is ready to help me with the next section.	75	150	45	65	105
10540259662	225655114	02/20/2019 06:50:43 AM	02/20/2019 06:58:20 AM	68.187.208.23	Yes, I have read the above information and agree to participate in the survey.	United States	Resident/ Residency Trained		<2 years	Female	75	150	30	40	55	Yes, the Guide is ready to help me with the next section.	75	125	65	70	110
10540784439	225655114	02/20/2019 09:46:59 AM	02/20/2019 10:00:52 AM	130.64.244.101	Yes, I have read the above information and agree to participate in the survey.	United States	Specialist (e.g. European or American Diplomat, ANZCVS Fellow)		>15	Female	15	75	13	40	28	Yes, the Guide is ready to help me with the next section.	80	120	56	60	112
10568518304	225655114	2019-05-03 00:46:00	2019-05-03 01:00:00	92.40.249.36	Yes, I have read the above information and agree to participate in the survey.	United Kingdom	Specialist (e.g. European or American Diplomat, ANZCVS Fellow)		2015-10-01	Female	25	75	8	23	35	Yes, the Guide is ready to help me with the next section.	80	120	34	50	77
10541241705	225655114	02/20/2019 02:01:56 PM	02/20/2019 02:13:00 PM	49.255.16.210	Yes, I have read the above information and agree to participate in the survey.	Australia	Specialist (e.g. European or American Diplomat, ANZCVS Fellow)		>15	Female	50	50	18	15	40	Yes, the Guide is ready to help me with the next section.	80	140	65	80	135
10540500478	225655114	02/20/2019 08:03:08 AM	02/20/2019 08:15:38 AM	141.226.93.137	Yes, I have read the above information and agree to participate in the survey.	Israel	Specialist (e.g. European or American Diplomat, ANZCVS Fellow)		2015-10-01	Male	30	70	12	25	47	Yes, the Guide is ready to help me with the next section.	80	80	60	60	100
10600593372	225655114	03/19/2019 03:47:27 AM	03/19/2019 03:55:33 AM	209.121.141.26	Yes, I have read the above information and agree to participate in the survey.	Canada	Specialist (e.g. European or American Diplomat, ANZCVS Fellow)	Diplomate ACVAA	2015-10-01	Female	35	100	40	25	55	Yes, the Guide is ready to help me with the next section.	80	140	78	65	105
10616053386	225655114	03/25/2019 07:20:19 PM	03/25/2019 07:55:37 PM	85.234.65.57	Yes, I have read the above information and agree to participate in the survey.	United Kingdom	Specialist (e.g. European or American Diplomat, ANZCVS Fellow)		2015-10-01	Female	50	75	7.5	30	55	Yes, the Guide is ready to help me with the next section.	80	120	75	75	106
10545250306	225655114	02/21/2019 10:24:10 PM	02/21/2019 10:31:42 PM	86.179.148.149	Yes, I have read the above information and agree to participate in the survey.	United Kingdom	Specialist (e.g. European or American Diplomat, ANZCVS Fellow)		>15	Male	100	100	40	25	55	Yes, the Guide is ready to help me with the next section.	80	120	34	55	112
10543229794	225655114	02/21/2019 04:08:13 AM	02/21/2019 04:15:29 AM	24.106.57.178	Yes, I have read the above information and agree to participate in the survey.	United States	Specialist (e.g. European or American Diplomat, ANZCVS Fellow)		2019-05-02	Female	40	100	15	35	70	Yes, the Guide is ready to help me with the next section.	80	140	36	60	110
10564574797	225655114	2019-02-03 05:08:00	2019-02-03 05:18:00	139.47.8.147	Yes, I have read the above information and agree to participate in the survey.	Spain	Advanced General Practice Veterinarian (Membership/Certificate - any discipline)		>15	Male	20	150	40	30	75	Yes, the Guide is ready to help me with the next section.	80	200	75	90	125
10539456097	225655114	02/20/2019 02:15:21 AM	02/20/2019 02:30:21 AM	128.210.106.129	Yes, I have read the above information and agree to participate in the survey.	United States	Specialist (e.g. European or American Diplomat, ANZCVS Fellow)	DACVAA	>15	Female	80	120	50	45	85	Yes, the Guide is ready to help me with the next section.	80	100	66	55	110
10556460697	225655114	02/27/2019 04:05:32 AM	02/27/2019 04:21:50 AM	132.204.162.64	Yes, I have read the above information and agree to participate in the survey.	Canada	General Practice Veterinarian	Ph.D	2019-10-05	Male	30	60	40	30	100	Yes, the Guide is ready to help me with the next section.	80	140	60	55	108
10550973075	225655114	02/24/2019 11:35:35 AM	02/24/2019 11:53:23 AM	64.228.188.90	Yes, I have read the above information and agree to participate in the survey.	Canada	Resident/ Residency Trained		>15	Male	80	80	25	50	100	Yes, the Guide is ready to help me with the next section.	80	100	70	70	104
10555959903	225655114	02/27/2019 01:13:09 AM	02/27/2019 01:22:42 AM	132.204.162.64	Yes, I have read the above information and agree to participate in the survey.	Canada	Student		I am still a student	Female	80	100	15	50	115	Yes, the Guide is ready to help me with the next section.	80	110	46	50	97
10615694488	225655114	03/25/2019 01:29:14 PM	03/25/2019 01:38:35 PM	103.5.142.234	Yes, I have read the above information and agree to participate in the survey.	Japan	General Practice Veterinarian		2019-05-02	Male	30	80	30	100	120	Yes, the Guide is ready to help me with the next section.	80	140	45	65	110
10616839400	225655114	03/26/2019 01:18:12 AM	03/26/2019 01:24:13 AM	167.96.144.62	Yes, I have read the above information and agree to participate in the survey.	United States	Specialist (e.g. European or American Diplomat, ANZCVS Fellow)		2015-10-01	Female	100	100	50	50	150	Yes, the Guide is ready to help me with the next section.	80	140	35	65	110
10546293778	225655114	02/22/2019 05:06:39 AM	02/22/2019 05:12:43 AM	5.59.71.182	Yes, I have read the above information and agree to participate in the survey.	Spain	General Practice Veterinarian		2019-05-02	Female	30	100	30	150	200	Yes, the Guide is ready to help me with the next section.	80	140	100	200	240
10551566384	225655114	02/25/2019 03:18:16 AM	02/25/2019 03:27:43 AM	64.228.188.90	Yes, I have read the above information and agree to participate in the survey.	Canada	Specialist (e.g. European or American Diplomat, ANZCVS Fellow)		2019-10-05	Female	100	150	70	120	350	Yes, the Guide is ready to help me with the next section.	80	100	55	70	97
10539915729	225655114	02/20/2019 05:01:04 AM	02/20/2019 05:09:32 AM	178.189.219.22	Yes, I have read the above information and agree to participate in the survey.	Austria	Specialist (e.g. European or American Diplomat, ANZCVS Fellow)		>15	Female	20	100	70	40	60	Yes, the Guide is ready to help me with the next section.	90	140	55	70	110
10539583693	225655114	02/20/2019 03:00:52 AM	02/20/2019 03:10:52 AM	70.62.25.2	Yes, I have read the above information and agree to participate in the survey.	United States	Specialist (e.g. European or American Diplomat, ANZCVS Fellow)	ACVAA	>15	Female	10	50	10	40	80	Yes, the Guide is ready to help me with the next section.	90	140	54	80	96
10542062129	225655114	02/20/2019 10:16:52 PM	02/20/2019 10:27:10 PM	193.146.127.125	Yes, I have read the above information and agree to participate in the survey.	Spain	Specialist (e.g. European or American Diplomat, ANZCVS Fellow)		2019-10-05	Female	100	50	20	40	150	Yes, the Guide is ready to help me with the next section.	90	140	30	50	110
10556991007	225655114	02/27/2019 07:31:44 AM	02/27/2019 07:38:53 AM	132.204.162.181	Yes, I have read the above information and agree to participate in the survey.	Canada	Advanced General Practice Veterinarian (Membership/Certificate - any discipline)		2019-05-02	Male	10	50	30	15	15	Yes, the Guide is ready to help me with the next section.	100	140	40	45	64
10539658977	225655114	02/20/2019 03:26:07 AM	02/20/2019 03:29:40 AM	131.212.249.244	Yes, I have read the above information and agree to participate in the survey.	United States	Resident/ Residency Trained		2019-05-02	Male	10	10	30	10	20	Yes, the Guide is ready to help me with the next section.	100	80	60	15	30
10556878044	225655114	02/27/2019 06:47:18 AM	02/27/2019 06:55:44 AM	132.204.200.145	Yes, I have read the above information and agree to participate in the survey.	Canada	Nurse/Technician		>15	Female	100	100	60	30	20	Yes, the Guide is ready to help me with the next section.	100	140	75	50	70
10539878504	225655114	02/20/2019 04:47:31 AM	02/20/2019 04:56:12 AM	152.7.224.13	Yes, I have read the above information and agree to participate in the survey.	United States	Specialist (e.g. European or American Diplomat, ANZCVS Fellow)		2019-05-02	Female	50	75	15	10	30	Yes, the Guide is ready to help me with the next section.	100	125	60	65	110
10541684731	225655114	02/20/2019 07:08:20 PM	02/20/2019 07:19:00 PM	90.173.86.124	Yes, I have read the above information and agree to participate in the survey.	Spain	Resident/ Residency Trained		2019-10-05	Male	10	100	22	16	35	Yes, the Guide is ready to help me with the next section.	100	140	70	35	107
10541562402	225655114	02/20/2019 06:10:31 PM	02/20/2019 06:18:56 PM	176.151.58.118	Yes, I have read the above information and agree to participate in the survey.	France	Resident/ Residency Trained		2015-10-01	Female	50	80	20	25	40	Yes, the Guide is ready to help me with the next section.	100	150	38	65	110
10631207147	225655114	2019-01-04 07:10:00	2019-01-04 07:20:00	90.242.239.22	Yes, I have read the above information and agree to participate in the survey.	United Kingdom	Specialist (e.g. European or American Diplomat, ANZCVS Fellow)		2015-10-01	Male	80	100	20	15	40	Yes, the Guide is ready to help me with the next section.	100	140	36	66	110
10556160585	225655114	02/27/2019 02:24:46 AM	02/27/2019 02:29:53 AM	132.204.243.253	Yes, I have read the above information and agree to participate in the survey.	Canada	Student		I am still a student	Female	100	100	10	30	40	Yes, the Guide is ready to help me with the next section.	100	140	40	90	128
10539527856	225655114	02/20/2019 02:42:13 AM	02/20/2019 02:51:03 AM	130.209.6.40	Yes, I have read the above information and agree to participate in the survey.	United Kingdom	Resident/ Residency Trained		2019-05-02	Male	100	50	20	25	45	Yes, the Guide is ready to help me with the next section.	100	120	35	70	135
10564204447	225655114	2019-02-03 02:34:00	2019-02-03 02:40:00	137.101.133.120	Yes, I have read the above information and agree to participate in the survey.	Spain	Advanced General Practice Veterinarian (Membership/Certificate - any discipline)		>15	Male	10	50	20	10	50	Yes, the Guide is ready to help me with the next section.	100	120	80	80	100
10624094043	225655114	03/28/2019 12:54:16 PM	03/28/2019 01:26:02 PM	49.255.173.210	Yes, I have read the above information and agree to participate in the survey.	Australia	Specialist (e.g. European or American Diplomat, ANZCVS Fellow)		2015-10-01	Female	60	50	25	30	50	Yes, the Guide is ready to help me with the next section.	100	100	55	60	90
10615724512	225655114	03/25/2019 02:02:19 PM	03/25/2019 02:15:11 PM	129.127.30.157	Yes, I have read the above information and agree to participate in the survey.	Australia	Specialist (e.g. European or American Diplomat, ANZCVS Fellow)		>15	Male	45	60	30	40	60	Yes, the Guide is ready to help me with the next section.	100	120	80	65	120
10564206949	225655114	2019-02-03 02:35:00	2019-02-03 02:41:00	85.56.88.221	Yes, I have read the above information and agree to participate in the survey.	United Kingdom	General Practice Veterinarian		2019-10-05		100	100	20	20	60	Yes, the Guide is ready to help me with the next section.	100	140	38	65	120
10565462387	225655114	2019-02-03 16:32:00	2019-02-03 16:36:00	88.110.118.25	Yes, I have read the above information and agree to participate in the survey.	United Kingdom	Resident/ Residency Trained		2019-10-05	Female	80	80	60	30	70	Yes, the Guide is ready to help me with the next section.	100	100	80	90	70
10556870580	225655114	02/27/2019 06:44:28 AM	02/27/2019 06:52:37 AM	132.204.200.16	Yes, I have read the above information and agree to participate in the survey.	Canada	Student		I am still a student	Female	100	100	10	10	75	Yes, the Guide is ready to help me with the next section.	100	100	80	80	129
10559837021	225655114	02/28/2019 08:39:37 AM	02/28/2019 08:45:05 AM	132.204.243.251	Yes, I have read the above information and agree to participate in the survey.	Canada	Student		2019-05-02	Male	30	80	15	25	80	Yes, the Guide is ready to help me with the next section.	100	140	75	80	110
10539799601	225655114	02/20/2019 04:16:52 AM	02/20/2019 04:23:05 AM	74.105.118.101	Yes, I have read the above information and agree to participate in the survey.	United States	Specialist (e.g. European or American Diplomat, ANZCVS Fellow)		2015-10-01	Female	40	30	30	25	80	Yes, the Guide is ready to help me with the next section.	100	140	76	90	80
10539629215	225655114	02/20/2019 03:14:51 AM	02/20/2019 03:27:10 AM	83.218.135.122	Yes, I have read the above information and agree to participate in the survey.	United Kingdom	Specialist (e.g. European or American Diplomat, ANZCVS Fellow)		>15	Male	50	60	30	50	80	Yes, the Guide is ready to help me with the next section.	100	120	40	100	140
10548196753	225655114	02/23/2019 12:01:48 AM	02/23/2019 12:07:33 AM	131.211.164.125	Yes, I have read the above information and agree to participate in the survey.	Afghanistan	Resident/ Residency Trained		<2 years	Female	100	50	12	30	80	Yes, the Guide is ready to help me with the next section.	100	150	65	100	210
10616360665	225655114	03/25/2019 10:22:31 PM	03/25/2019 10:27:55 PM	131.204.254.83	Yes, I have read the above information and agree to participate in the survey.	United States	Specialist (e.g. European or American Diplomat, ANZCVS Fellow)		>15	Male	30	70	25	30	100	Yes, the Guide is ready to help me with the next section.	100	120	75	90	107
10539458838	225655114	02/20/2019 02:16:31 AM	02/20/2019 02:28:24 AM	46.227.51.196	Yes, I have read the above information and agree to participate in the survey.	United Kingdom	Specialist (e.g. European or American Diplomat, ANZCVS Fellow)		2019-10-05	Female	40	100	12	80	100	Yes, the Guide is ready to help me with the next section.	100	100	70	80	120
10550384187	225655114	02/24/2019 12:48:48 AM	02/24/2019 12:51:48 AM	95.63.72.96	Yes, I have read the above information and agree to participate in the survey.	Spain	Specialist (e.g. European or American Diplomat, ANZCVS Fellow)		>15	Male	60	50	20	30	100	Yes, the Guide is ready to help me with the next section.	100	100	50	100	100
10539705159	225655114	02/20/2019 03:43:04 AM	02/20/2019 03:53:40 AM	68.102.25.204	Yes, I have read the above information and agree to participate in the survey.	United States	Specialist (e.g. European or American Diplomat, ANZCVS Fellow)		>15	Female	75	75	30	60	100	Yes, the Guide is ready to help me with the next section.	100	125	36	65	120
10582916178	225655114	2019-11-03 06:35:00	2019-11-03 06:53:00	5.80.175.64	Yes, I have read the above information and agree to participate in the survey.	United Kingdom	Specialist (e.g. European or American Diplomat, ANZCVS Fellow)		>15	Male	100	150	20	15	100	Yes, the Guide is ready to help me with the next section.	100	150	40	100	110
10692902975	225655114	04/29/2019 09:19:13 AM	04/29/2019 09:35:39 AM	129.78.56.179	Yes, I have read the above information and agree to participate in the survey.	Australia	Resident/ Residency Trained		>15	Female	80	70	15	30	110	Yes, the Guide is ready to help me with the next section.	100	100	70	70	115
10539489339	225655114	02/20/2019 02:29:18 AM	02/20/2019 02:34:57 AM	128.194.23.215	Yes, I have read the above information and agree to participate in the survey.	United States	Specialist (e.g. European or American Diplomat, ANZCVS Fellow)		2015-10-01	Female	10	100	20	50	115	Yes, the Guide is ready to help me with the next section.	100	100	35	75	110
10618904762	225655114	03/26/2019 07:56:34 PM	03/26/2019 08:05:46 PM	77.185.173.255	Yes, I have read the above information and agree to participate in the survey.	Germany	Specialist (e.g. European or American Diplomat, ANZCVS Fellow)		2015-10-01	Female	50	100	10	50	115	Yes, the Guide is ready to help me with the next section.	100	140	74	50	115
10624655419	225655114	03/28/2019 08:11:29 PM	03/28/2019 08:22:57 PM	129.215.126.29	Yes, I have read the above information and agree to participate in the survey.	United Kingdom	Specialist (e.g. European or American Diplomat, ANZCVS Fellow)	ECVAA diplomate	>15	Female	100	100	30	50	115	Yes, the Guide is ready to help me with the next section.	100	130	78	80	126
10541150603	225655114	02/20/2019 01:06:06 PM	02/20/2019 01:15:34 PM	24.25.142.87	Yes, I have read the above information and agree to participate in the survey.	United States	Specialist (e.g. European or American Diplomat, ANZCVS Fellow)		>15	Female	75	75	50	50	125	Yes, the Guide is ready to help me with the next section.	100	100	25	100	110
10615947036	225655114	03/25/2019 06:01:18 PM	03/25/2019 06:35:55 PM	89.206.64.3	Yes, I have read the above information and agree to participate in the survey.	Switzerland	Specialist (e.g. European or American Diplomat, ANZCVS Fellow)		>15	Female	50	100	25	100	150	Yes, the Guide is ready to help me with the next section.	100	140	36	65	130
10620922681	225655114	03/27/2019 09:30:52 AM	03/27/2019 09:37:53 AM	80.31.198.231	Yes, I have read the above information and agree to participate in the survey.	Spain	General Practice Veterinarian		>15	Male	15	80	140	100	180	Yes, the Guide is ready to help me with the next section.	100	180	80	130	200
10544484290	225655114	02/21/2019 12:55:35 PM	02/21/2019 01:04:49 PM	99.225.187.221	Yes, I have read the above information and agree to participate in the survey.	Canada	Resident/ Residency Trained		2019-05-02	Male	35	90	35	50	200	Yes, the Guide is ready to help me with the next section.	100	150	80	65	135
10545823593	225655114	02/22/2019 02:20:05 AM	02/22/2019 02:26:53 AM	90.174.5.16	Yes, I have read the above information and agree to participate in the survey.	Spain	Intern		2019-05-02	Female	100	150	20	200	200	Yes, the Guide is ready to help me with the next section.	100	120	15	65	80
10542514037	225655114	02/21/2019 12:30:27 AM	02/21/2019 12:40:10 AM	90.173.86.124	Yes, I have read the above information and agree to participate in the survey.	Spain	Specialist (e.g. European or American Diplomat, ANZCVS Fellow)		2019-10-05	Female	25	100	15	200	300	Yes, the Guide is ready to help me with the next section.	100	120	40	65	120
10567214376	225655114	2019-04-03 06:15:00	2019-04-03 07:01:00	88.19.217.183	Yes, I have read the above information and agree to participate in the survey.	Spain	Advanced General Practice Veterinarian (Membership/Certificate - any discipline)		>15	Female	15	35	25	55	70	Yes, the Guide is ready to help me with the next section.	110	150	45	95	133
10642920830	225655114	2019-05-04 12:19:00	2019-05-04 12:28:00	174.2.8.248	Yes, I have read the above information and agree to participate in the survey.	Canada	Resident/ Residency Trained		<2 years	Female	70	125	30	18	300	Yes, the Guide is ready to help me with the next section.	110	150	66	70	121
10551153320	225655114	02/24/2019 05:05:04 PM	02/24/2019 05:13:24 PM	185.252.56.17	Yes, I have read the above information and agree to participate in the survey.	Spain	General Practice Veterinarian	And PhD	2019-10-05	Male	15	50	3	8	10	Yes, the Guide is ready to help me with the next section.	120	200	70	20	120
10568070247	225655114	2019-04-03 20:55:00	2019-04-03 21:06:00	5.95.215.141	Yes, I have read the above information and agree to participate in the survey.	Italy	Resident/ Residency Trained		2015-10-01	Female	100	100	5	10	14	Yes, the Guide is ready to help me with the next section.	120	140	34	65	126
10550488792	225655114	02/24/2019 02:27:19 AM	02/24/2019 05:44:17 AM	89.80.110.244	Yes, I have read the above information and agree to participate in the survey.	France	Specialist (e.g. European or American Diplomat, ANZCVS Fellow)		2019-10-05	Female	50	50	20	5	15	Yes, the Guide is ready to help me with the next section.	120	140	80	50	120
10539669809	225655114	02/20/2019 03:21:40 AM	02/20/2019 03:37:07 AM	165.123.205.159	Yes, I have read the above information and agree to participate in the survey.	United States	Resident/ Residency Trained		2019-05-02	Female	100	75	7	20	26	Yes, the Guide is ready to help me with the next section.	120	140	74	75	114
10550558966	225655114	02/24/2019 03:33:15 AM	02/24/2019 03:42:31 AM	46.6.216.24	Yes, I have read the above information and agree to participate in the survey.	Spain	Advanced General Practice Veterinarian (Membership/Certificate - any discipline)		2015-10-01	Female	15	80	8	30	40	Yes, the Guide is ready to help me with the next section.	120	200	70	100	250
10626869694	225655114	03/29/2019 01:00:12 PM	03/29/2019 01:09:40 PM	24.112.77.212	Yes, I have read the above information and agree to participate in the survey.	United States	Specialist (e.g. European or American Diplomat, ANZCVS Fellow)		2015-10-01	Female	20	100	8	15	40	Yes, the Guide is ready to help me with the next section.	120	140	35	55	105
10625390956	225655114	03/29/2019 01:26:47 AM	03/29/2019 01:35:24 AM	81.184.204.14	Yes, I have read the above information and agree to participate in the survey.	Spain	Specialist (e.g. European or American Diplomat, ANZCVS Fellow)		>15	Male	20	85	15	22	40	Yes, the Guide is ready to help me with the next section.	120	120	80	80	82
10545097287	225655114	02/21/2019 08:52:26 PM	02/21/2019 09:07:03 PM	62.37.68.71	Yes, I have read the above information and agree to participate in the survey.	Spain	General Practice Veterinarian		2019-10-05	Female	20	100	20	10	40	Yes, the Guide is ready to help me with the next section.	120	200	40	60	100
10544048640	225655114	02/21/2019 09:05:26 AM	02/21/2019 09:11:09 AM	81.140.237.146	Yes, I have read the above information and agree to participate in the survey.	United Kingdom	Specialist (e.g. European or American Diplomat, ANZCVS Fellow)		>15	Male	30	30	20	25	40	Yes, the Guide is ready to help me with the next section.	120	140	77	65	200
10552363718	225655114	02/25/2019 05:31:54 PM	02/25/2019 05:36:36 PM	89.206.64.1	Yes, I have read the above information and agree to participate in the survey.	Switzerland	Specialist (e.g. European or American Diplomat, ANZCVS Fellow)		2019-10-05	Female	50	80	20	20	40	Yes, the Guide is ready to help me with the next section.	120	120	70	60	90
10550421417	225655114	02/24/2019 01:23:32 AM	02/24/2019 01:30:53 AM	83.47.177.13	Yes, I have read the above information and agree to participate in the survey.	Spain	Advanced General Practice Veterinarian (Membership/Certificate - any discipline)		>15	Male	50	100	20	30	40	Yes, the Guide is ready to help me with the next section.	120	150	50	20	50
10539872622	225655114	02/20/2019 04:45:11 AM	02/20/2019 04:53:38 AM	198.137.18.13	Yes, I have read the above information and agree to participate in the survey.	United States	Resident/ Residency Trained		2019-10-05	Female	60	100	15	25	50	Yes, the Guide is ready to help me with the next section.	120	150	57	70	107
10615996862	225655114	03/25/2019 06:41:44 PM	03/25/2019 06:50:51 PM	95.146.218.222	Yes, I have read the above information and agree to participate in the survey.	United Kingdom	Resident/ Residency Trained	ECVAA residency trained	2019-10-05	Female	100	150	15	15	50	Yes, the Guide is ready to help me with the next section.	120	140	35	25	180
10615840085	225655114	03/25/2019 04:18:52 PM	03/25/2019 04:26:35 PM	129.78.56.173	Yes, I have read the above information and agree to participate in the survey.	Australia	Resident/ Residency Trained		2015-10-01	Male	30	100	20	40	55	Yes, the Guide is ready to help me with the next section.	120	140	76	65	130
10543406420	225655114	02/21/2019 05:09:27 AM	02/21/2019 05:20:12 AM	164.107.154.0	Yes, I have read the above information and agree to participate in the survey.	United States	Specialist (e.g. European or American Diplomat, ANZCVS Fellow)		>15	Female	60	80	25	35	60	Yes, the Guide is ready to help me with the next section.	120	140	35	65	100
10541906643	225655114	02/20/2019 09:01:00 PM	02/20/2019 09:08:19 PM	5.81.222.78	Yes, I have read the above information and agree to participate in the survey.	United Kingdom	Specialist (e.g. European or American Diplomat, ANZCVS Fellow)		2019-10-05	Female	50	200	20	40	70	Yes, the Guide is ready to help me with the next section.	120	140	80	90	130
10539498990	225655114	02/20/2019 02:32:54 AM	02/20/2019 02:39:12 AM	24.142.205.194	Yes, I have read the above information and agree to participate in the survey.	United States	Specialist (e.g. European or American Diplomat, ANZCVS Fellow)		2019-05-02	Female	75	100	50	60	75	Yes, the Guide is ready to help me with the next section.	120	140	80	65	130
10556785905	225655114	02/27/2019 06:11:24 AM	02/27/2019 06:19:30 AM	206.167.243.2	Yes, I have read the above information and agree to participate in the survey.	Canada	Student		I am still a student	Male	20	46	25	30	80	Yes, the Guide is ready to help me with the next section.	120	120	90	70	100
10540061373	225655114	02/20/2019 05:46:31 AM	02/20/2019 05:57:31 AM	209.181.251.71	Yes, I have read the above information and agree to participate in the survey.	United States	Specialist (e.g. European or American Diplomat, ANZCVS Fellow)		2015-10-01	Female	50	100	30	50	80	Yes, the Guide is ready to help me with the next section.	120	175	55	60	108
10599345015	225655114	03/18/2019 07:12:53 PM	03/18/2019 07:28:29 PM	46.226.49.230	Yes, I have read the above information and agree to participate in the survey.	United Kingdom	Specialist (e.g. European or American Diplomat, ANZCVS Fellow)		>15	Female	75	90	15	60	90	Yes, the Guide is ready to help me with the next section.	120	140	140	70	78
10539464347	225655114	02/20/2019 02:21:00 AM	02/20/2019 02:26:49 AM	85.234.65.57	Yes, I have read the above information and agree to participate in the survey.	United Kingdom	Specialist (e.g. European or American Diplomat, ANZCVS Fellow)		>15	Female	100	200	50	100	100	Yes, the Guide is ready to help me with the next section.	120	100	78	90	130
10539573124	225655114	02/20/2019 02:58:10 AM	02/20/2019 03:03:51 AM	82.71.242.249	Yes, I have read the above information and agree to participate in the survey.	United Kingdom	Specialist (e.g. European or American Diplomat, ANZCVS Fellow)		2015-10-01	Female	180	180	70	90	100	Yes, the Guide is ready to help me with the next section.	120	140	150	60	118
10621031716	225655114	03/27/2019 10:38:48 AM	03/27/2019 10:44:58 AM	130.102.13.49	Yes, I have read the above information and agree to participate in the survey.	Australia	Specialist (e.g. European or American Diplomat, ANZCVS Fellow)		>15	Female	10	150	10	70	110	Yes, the Guide is ready to help me with the next section.	120	140	78	90	125
10539482831	225655114	02/20/2019 02:17:11 AM	02/20/2019 02:31:38 AM	72.138.36.107	Yes, I have read the above information and agree to participate in the survey.	Canada	Specialist (e.g. European or American Diplomat, ANZCVS Fellow)		2015-10-01	Female	30	100	8	55	115	Yes, the Guide is ready to help me with the next section.	120	140	38	70	126
10541160701	225655114	02/20/2019 01:12:10 PM	02/20/2019 01:19:20 PM	198.84.217.221	Yes, I have read the above information and agree to participate in the survey.	Canada	Specialist (e.g. European or American Diplomat, ANZCVS Fellow)		2019-05-02	Female	100	50	40	50	120	Yes, the Guide is ready to help me with the next section.	120	140	76	60	110
10540538104	225655114	02/20/2019 08:15:14 AM	02/20/2019 08:21:41 AM	37.228.253.155	Yes, I have read the above information and agree to participate in the survey.	Ireland	Resident/ Residency Trained		2019-05-02	Female	100	100	70	57	155	Yes, the Guide is ready to help me with the next section.	120	120	20	55	132
10550519024	225655114	02/24/2019 02:55:38 AM	02/24/2019 02:57:44 AM	82.132.225.140	Yes, I have read the above information and agree to participate in the survey.	United Kingdom	Intern		2019-10-05	Male	100	120	60	120	200	Yes, the Guide is ready to help me with the next section.	120	200	60	20	120
10539449829	225655114	02/20/2019 02:16:22 AM	02/20/2019 02:35:45 AM	128.136.212.132	Yes, I have read the above information and agree to participate in the survey.	United States	Specialist (e.g. European or American Diplomat, ANZCVS Fellow)		2019-10-05	Female	100	75	140	150	300	Yes, the Guide is ready to help me with the next section.	120	140	80	95	118
10621393612	225655114	03/27/2019 03:13:00 PM	03/27/2019 03:24:50 PM	49.181.206.120	Yes, I have read the above information and agree to participate in the survey.	Australia	General Practice Veterinarian		2019-05-02	Male	50	200	300	200	100	Yes, the Guide is ready to help me with the next section.	120	200	68	70	108
10564449261	225655114	2019-02-03 04:11:00	2019-02-03 04:28:00	187.216.237.242	Yes, I have read the above information and agree to participate in the survey.	Mexico	Advanced General Practice Veterinarian (Membership/Certificate - any discipline)		>15	Male	20	200	15	70	250	Yes, the Guide is ready to help me with the next section.	125	140	30	5	65
10618358199	225655114	03/26/2019 12:33:07 PM	03/26/2019 12:44:39 PM	130.102.13.193	Yes, I have read the above information and agree to participate in the survey.	Australia	Advanced General Practice Veterinarian (Membership/Certificate - any discipline)		>15	Female	50	130	12	15	50	Yes, the Guide is ready to help me with the next section.	130	160	66	70	108
10539488726	225655114	02/20/2019 02:29:13 AM	02/20/2019 02:38:59 AM	185.29.0.201	Yes, I have read the above information and agree to participate in the survey.	United Kingdom	Resident/ Residency Trained		2019-10-05	Male	80	150	7	10	25	Yes, the Guide is ready to help me with the next section.	180	150	7	40	95
10544307190	225655114	02/21/2019 11:10:00 AM	02/21/2019 11:15:52 AM	186.12.9.112	Yes, I have read the above information and agree to participate in the survey.	Argentina	Advanced General Practice Veterinarian (Membership/Certificate - any discipline)		>15	Male	150	120	10	7	12
10616737596	225655114	03/26/2019 12:45:30 AM	03/26/2019 12:49:02 AM	85.255.232.31	Yes, I have read the above information and agree to participate in the survey.	United Kingdom	Specialist (e.g. European or American Diplomat, ANZCVS Fellow)		>15	Male	20	50	20	30	20	Yes, the Guide is ready to help me with the next section.
10618986743	225655114	03/26/2019 08:44:42 PM	03/26/2019 08:48:03 PM	98.219.222.34	Yes, I have read the above information and agree to participate in the survey.	United States	Nurse/Technician		>15	Female	40	60	10	15	20
10564428980	225655114	2019-02-03 04:06:00	2019-02-03 04:09:00	31.4.190.238	Yes, I have read the above information and agree to participate in the survey.	Spain	Advanced General Practice Veterinarian (Membership/Certificate - any discipline)		2015-10-01	Male	40	80	10	10	20	Yes, the Guide is ready to help me with the next section.
10564182928	225655114	2019-02-03 02:26:00	2019-02-03 02:33:00	85.56.88.221	Yes, I have read the above information and agree to participate in the survey.	United Kingdom	Intern		2019-05-02	Female	100	100	10	3	20	Yes, the Guide is ready to help me with the next section.
10541726376	225655114	02/20/2019 07:30:09 PM	02/20/2019 07:33:00 PM	193.16.4.139	Yes, I have read the above information and agree to participate in the survey.	Germany	Specialist (e.g. European or American Diplomat, ANZCVS Fellow)		2015-10-01	Female	15	60	10	15	30	Yes, the Guide is ready to help me with the next section.
10540035596	225655114	02/20/2019 05:36:36 AM	02/20/2019 05:41:00 AM	134.121.104.151	Yes, I have read the above information and agree to participate in the survey.	United States	Advanced General Practice Veterinarian (Membership/Certificate - any discipline)		>15	Female	20	20	10	40	30	Yes, the Guide is ready to help me with the next section.
10550379892	225655114	02/24/2019 12:44:43 AM	02/24/2019 12:47:48 AM	95.63.72.96	Yes, I have read the above information and agree to participate in the survey.	Spain	Specialist (e.g. European or American Diplomat, ANZCVS Fellow)		>15	Male	50	20	2	5	30
10540451851	225655114	02/20/2019 07:47:55 AM	02/20/2019 07:54:11 AM	162.17.15.37	Yes, I have read the above information and agree to participate in the survey.	United States	Nurse/Technician	Vts (anesthesia&analgesia)	2015-10-01	Female	10	30	60	50	50	Yes, the Guide is ready to help me with the next section.
10616358950	225655114	03/25/2019 10:21:20 PM	03/25/2019 10:25:14 PM	194.230.155.152	Yes, I have read the above information and agree to participate in the survey.	Switzerland	Resident/ Residency Trained		2019-10-05	Female	15	150	20	10	50	No. I may need to go back.
10621056885	225655114	03/27/2019 10:55:11 AM	03/27/2019 10:57:40 AM	98.219.222.34	Yes, I have read the above information and agree to participate in the survey.	United States	Nurse/Technician		>15	Female	20	40	30	15	50	Yes, the Guide is ready to help me with the next section.
10545318568	225655114	02/21/2019 11:01:10 PM	02/21/2019 11:10:02 PM	95.127.172.38	Yes, I have read the above information and agree to participate in the survey.	Spain	General Practice Veterinarian		>15	Male	50	80	8	50	50	Yes, the Guide is ready to help me with the next section.
10545794929	225655114	02/22/2019 02:11:08 AM	02/22/2019 02:14:22 AM	179.18.62.204	Yes, I have read the above information and agree to participate in the survey.	Colombia	Advanced General Practice Veterinarian (Membership/Certificate - any discipline)		2019-10-05	Male	100	120	50	30	50	Yes, the Guide is ready to help me with the next section.
10550514707	225655114	02/24/2019 02:51:11 AM	02/24/2019 02:54:04 AM	82.132.225.140	Yes, I have read the above information and agree to participate in the survey.	United Kingdom	Intern		2019-10-05	Male	10	50	12	20	60
10548903775	225655114	02/23/2019 04:29:44 AM	02/23/2019 04:35:05 AM	90.174.179.218	Yes, I have read the above information and agree to participate in the survey.	Spain	Specialist (e.g. European or American Diplomat, ANZCVS Fellow)		2019-10-05	Female	30	100	30	20	60
10564630932	225655114	2019-02-03 05:34:00	2019-02-03 05:39:00	90.252.135.117	Yes, I have read the above information and agree to participate in the survey.	United Kingdom	Advanced General Practice Veterinarian (Membership/Certificate - any discipline)		2015-10-01	Female	100	100	20	40	60
10545137462	225655114	02/21/2019 09:19:05 PM	02/21/2019 09:23:46 PM	195.195.217.140	Yes, I have read the above information and agree to participate in the survey.	United Kingdom	Specialist (e.g. European or American Diplomat, ANZCVS Fellow)		>15	Female	100	200	15	25	65	Yes, the Guide is ready to help me with the next section.
10621884087	225655114	03/27/2019 09:24:04 PM	03/27/2019 09:29:00 PM	47.183.16.136	Yes, I have read the above information and agree to participate in the survey.	United States	Nurse/Technician		>15	Female	30	120	40	75	75	Yes, the Guide is ready to help me with the next section.
10616274956	225655114	03/25/2019 09:38:36 PM	03/25/2019 09:48:30 PM	81.100.148.40	Yes, I have read the above information and agree to participate in the survey.	United Kingdom	Specialist (e.g. European or American Diplomat, ANZCVS Fellow)		2019-05-02	Female	25	75	22	30	90	Yes, the Guide is ready to help me with the next section.
10550632994	225655114	02/24/2019 04:45:06 AM	02/24/2019 04:49:49 AM	176.83.182.146	Yes, I have read the above information and agree to participate in the survey.	Spain	Advanced General Practice Veterinarian (Membership/Certificate - any discipline)		>15	Male	10	70	30	30	100	Yes, the Guide is ready to help me with the next section.
10545186231	225655114	02/21/2019 09:46:23 PM	02/21/2019 09:53:36 PM	91.116.195.220	Yes, I have read the above information and agree to participate in the survey.	Spain	General Practice Veterinarian		2019-05-02	Male	10	80	20	30	100	Yes, the Guide is ready to help me with the next section.
10616907930	225655114	03/26/2019 01:40:29 AM	03/26/2019 01:43:51 AM	186.28.3.22	Yes, I have read the above information and agree to participate in the survey.	Colombia	Advanced General Practice Veterinarian (Membership/Certificate - any discipline)	MSc. Veterinary Anaesthesiology	>15	Male	15	200	50	30	100
10557349949	225655114	02/27/2019 10:30:29 AM	02/27/2019 10:37:19 AM	74.210.190.130	Yes, I have read the above information and agree to participate in the survey.	Japan	General Practice Veterinarian		2019-10-05	Male	80	120	85	40	110	Yes, the Guide is ready to help me with the next section.
10545604158	225655114	02/22/2019 01:03:00 AM	02/22/2019 01:04:52 AM	89.130.110.87	Yes, I have read the above information and agree to participate in the survey.	Spain	Advanced General Practice Veterinarian (Membership/Certificate - any discipline)		2019-10-05	Female	30	120	9	18	120	Yes, the Guide is ready to help me with the next section.
10556531895	225655114	02/27/2019 04:35:20 AM	02/27/2019 04:36:57 AM	132.204.162.64	Yes, I have read the above information and agree to participate in the survey.	Spain	Resident/ Residency Trained		>15	Male	80	120	60	90	120
10539625204	225655114	02/20/2019 03:13:40 AM	02/20/2019 03:18:05 AM	35.9.213.6	Yes, I have read the above information and agree to participate in the survey.	United States	Specialist (e.g. European or American Diplomat, ANZCVS Fellow)		2015-10-01	Male	50	100	200	100	130	Yes, the Guide is ready to help me with the next section.
10626336835	225655114	03/29/2019 07:29:53 AM	03/29/2019 07:32:08 AM	118.92.186.131	Yes, I have read the above information and agree to participate in the survey.	New Zealand	Nurse/Technician		>15	Female	35	140	56	70	138
10539623831	225655114	02/20/2019 03:13:02 AM	02/20/2019 03:17:55 AM	199.127.199.41	Yes, I have read the above information and agree to participate in the survey.	Grenada	Specialist (e.g. European or American Diplomat, ANZCVS Fellow)		>15	Female	20	150	25	50	150	Yes, the Guide is ready to help me with the next section.
10540034813	225655114	02/20/2019 05:37:41 AM	02/20/2019 05:39:30 AM	50.233.245.230	Yes, I have read the above information and agree to participate in the survey.	Canada	Specialist (e.g. European or American Diplomat, ANZCVS Fellow)		>15	Prefer not to say	50	175	45	125	200
10626322656	225655114	03/29/2019 07:23:09 AM	03/29/2019 07:27:52 AM	118.92.186.131	Yes, I have read the above information and agree to participate in the survey.	New Zealand	Nurse/Technician		>15	Female	33	140	42	110	208
10545652530	225655114	02/22/2019 01:20:17 AM	02/22/2019 01:25:00 AM	148.71.202.137	Yes, I have read the above information and agree to participate in the survey.	Portugal	General Practice Veterinarian		2019-10-05	Male	100	200	30	150	250
